# Supplementary material
Source: publisher figshare collection journal article supplement (https://karger.figshare.com/articles/dataset/_/16615960)
Supplement: Supplementary file 2 [file 1]

Archive with 2 entries (2 files):
- Supplementary material-Suriyun_Supplemental_Figure_Revised.pdf
- Supplementary material-Suriyun_Supplemental_Table_Revised.pdf
