# Supplementary material
Source: publisher figshare collection journal article supplement (https://karger.figshare.com/articles/dataset/_/16615960)
Supplement: Supplementary file 2 [file 1 › Supplementary material-Suriyun_Supplemental_Table_Revised.pdf]

**Association of the degree of erythroid expansion and maturation arrest with the clinical severity of  $\beta^0$ -thalassemia/HbE patients**

**Supplemental Table 1.**  $\beta$ -Thalassemia clinical severity scoring system.

**Supplemental Table 1.1** Clinical criteria, points scored and severity group according to Sripichai O, *et al*, 2008 [15].

| Clinical criteria                               | Points Scored      |                     |                 |                       |
|-------------------------------------------------|--------------------|---------------------|-----------------|-----------------------|
|                                                 | 0                  | 0.5                 | 1               | 2                     |
| Hemoglobin at steady state (g/dl)               | >7.5               |                     | 6 – 7.5         | <6                    |
| Age at thalassemia presentation (year)          | >10                | 3 – 10              | <3              |                       |
| Age at receiving first blood transfusion (year) | >10                |                     | 5 – 10          | <5                    |
| Requirement for blood transfusion               | None/rare          |                     | Occasional      | Regular               |
| Size of spleen (cm)                             | <3                 |                     | 3 – 10          | >10 or splenectomized |
| Growth and development                          | >25th percentile   | 3rd–25th percentile | <3rd percentile |                       |
| <b>Severity category</b>                        | <b>Total score</b> |                     |                 |                       |
| Mild                                            | 0 – 3.5            |                     |                 |                       |
| Moderate                                        | 4 – 7              |                     |                 |                       |
| Severe                                          | 7.5 – 10           |                     |                 |                       |

**Supplemental Table 1.2** Clinical parameter and severity group according to Sripichai O, *et al*, 2008 [15].

| Patients | Hemoglobin at steady state |       | Age at thalassemia presentation |       | Age at receiving first blood transfusion |       | Requirement for blood transfusion |       | Size of spleen |       | Growth and development |       | Total severity score | Disease group |
|----------|----------------------------|-------|---------------------------------|-------|------------------------------------------|-------|-----------------------------------|-------|----------------|-------|------------------------|-------|----------------------|---------------|
|          | g/dl                       | Score | year                            | Score | year                                     | Score | frequency                         | Score | cm             | Score | percentile             | Score |                      |               |
| BE1      | 8.2                        | 0     | 6                               | 0.5   | 50                                       | 0     | Rare                              | 0     | 2              | 0     | >P50                   | 0     | 0.5                  | Mild          |
| BE2      | 8.1                        | 0     | 10                              | 0.5   | Never                                    | 0     | Never                             | 0     | 0              | 0     | >P50                   | 0     | 0.5                  | Mild          |
| BE3      | 8.2                        | 0     | 4                               | 0.5   | Never                                    | 0     | Never                             | 0     | 8              | 1     | P10-P25                | 0.5   | 2.0                  | Mild          |
| BE4      | 9.1                        | 0     | 12                              | 0     | 12                                       | 0     | Rare                              | 0     | 0              | 0     | >P50                   | 0     | 0.0                  | Mild          |
| BE5      | 9.3                        | 0     | 1                               | 1     | Never                                    | 0     | Never                             | 0     | 5              | 1     | P25-P50                | 0     | 2.0                  | Mild          |
| BE6      | 8.2                        | 0     | <1                              | 1     | 4                                        | 2     | Occasional                        | 1     | 12             | 1     | <P3                    | 1     | 6.0                  | Moderate      |
| BE7      | 6.0                        | 1     | 1                               | 1     | 20                                       | 0     | Regular                           | 2     | Splenectomized | 2     | P25-P50                | 0     | 6.0                  | Moderate      |
| BE8      | 7.1                        | 1     | <1                              | 1     | Never                                    | 0     | Never                             | 0     | 10             | 1     | <P3                    | 1     | 4.0                  | Moderate      |
| BE9      | 7.0                        | 1     | 2                               | 1     | 8                                        | 1     | Rare                              | 0     | 9              | 1     | P25-P50                | 0     | 4.0                  | Moderate      |
| BE10     | 6.7                        | 1     | 7                               | 0.5   | 13                                       | 0     | Occasional                        | 1     | 16             | 2     | P25-P50                | 0     | 4.5                  | Moderate      |
| BE11     | 5.2                        | 2     | 2                               | 1     | 4                                        | 2     | Regular                           | 2     | 5              | 1     | >P50                   | 0     | 8.0                  | Severe        |
| BE12     | 6.2                        | 1     | <1                              | 2     | 3                                        | 2     | Regular                           | 2     | Splenectomized | 2     | <P3                    | 1     | 10.0                 | Severe        |
| BE13     | 6.0                        | 1     | 1                               | 1     | 1                                        | 2     | Regular                           | 2     | Splenectomized | 2     | <P3                    | 1     | 9.0                  | Severe        |
| BE14     | 6.6                        | 1     | 3                               | 0.5   | 4                                        | 2     | Regular                           | 2     | 12             | 2     | <P3                    | 1     | 8.5                  | Severe        |
| BE15     | 7.5                        | 1     | 2                               | 1     | 3                                        | 2     | Regular                           | 2     | 4              | 1     | P10-P25                | 0.5   | 7.5                  | Severe        |

**Supplemental Table 2.** List of primer for quantitative RT-PCR analysis.

| Gene name | PCR forward primer          | PCR reverse primer             |
|-----------|-----------------------------|--------------------------------|
| ACVR2A    | 5'-GATACCCATGGACAGGTTGG-3'  | 5'-TCATCTACAGGTCCATCTGC-3'     |
| ACVR2B    | 5'-CAACTGCTACGATAGGCAGG-3'  | 5'-TGGCTCGTACGTGACTTCC-3'      |
| FOXO3     | 5'-TCTGCCGGCTGGAAGAACTC-3'  | 5'-CCACGGCTCTTGGTATACTTGTTG-3' |
| GDF11     | 5'-GATCTTGAGCAAAGTGC GGC-3' | 5'-GTACTGCTGGGTCCGTCTC-3'      |
| HSP70     | 5'-AGCTGGAGCAGGTGTGTAAAC-3' | 5'-CAGCAATCTTGGAAGGCC -3'      |
| TGFBR1    | 5'-ACGGCGTTACAGTGTTTCTG-3'  | 5'-GCACATACAAACGGCCTATCTC-3'   |
| RPS18     | 5'-GGATGAGGTGGAACGTGT-3'    | 5'-CTAGGACCTGGCTGTATTTTC-3'    |
